# Supplementary material for: GITAR: An Open Source Tool for Analysis and Visualization of Hi-C Data
Source: PubMed Central journal article supplement (PMC6364044; doi:10.1016/j.gpb.2018.06.006), 2018-12-13

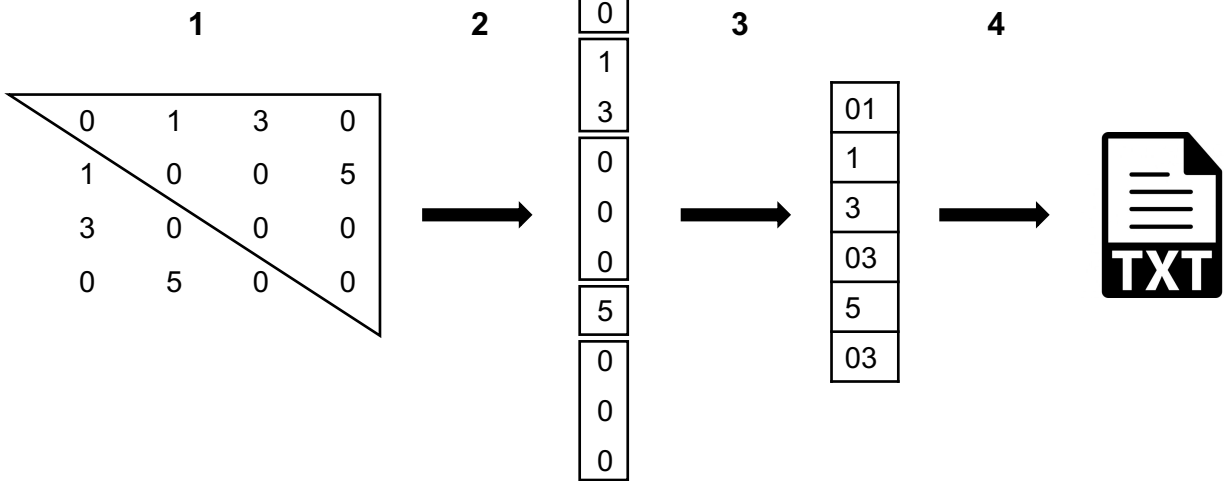

Supplement: mmc2.pdf [file mmc2.pdf]
